# Supplementary material for: Developing Evidence to Support Policy: Protocol for the StrAtegic PoLicy EvIdence-Based Evaluation CeNTer (SALIENT)
Source: PubMed Central journal article supplement (PMC11450355; doi:10.2196/59830), 2024-09-19
Supplement: resprot_v13i1e59830_app2.pdf [file resprot_v13i1e59830_app2.pdf]

~~Data resources compiled by SALIENT investigators to be used in future evaluations and scientific investigation.~~

1) Longitudinal Data for Post-9/11 Era Veterans developed within the Long-term Impact of Military Relevant Brain Injury Consortium: Phenotypes of Persistent Comorbidity in Post-9/11 Era Veterans with mTBI (LIMBIC; hereafter LIMBIC Phenotype study) (I01 RX003443-03)

**Table 1: Data resources for LIMBIC Phenotype Cohort.**

| <b>Data Source</b>                                                                        | <b>Purpose</b>                                                                                                                                                                                                                                                                        |
|-------------------------------------------------------------------------------------------|---------------------------------------------------------------------------------------------------------------------------------------------------------------------------------------------------------------------------------------------------------------------------------------|
| DoD Trauma Registry and Theatre Data Management Store                                     | Information on deployment related healthcare and injuries                                                                                                                                                                                                                             |
| Military Treatment Facility and Tricare inpatient, outpatient, and pharmacy care          | Longitudinal information on non-deployment related care                                                                                                                                                                                                                               |
| Other Specialized examination results                                                     | Audiogram, Tympanogram, Speech Audiometry, DOEHRs-HC, Immunizations, Device Exposure, etc.                                                                                                                                                                                            |
| VA DoD Identity Repository (VADIR)                                                        | Provides information on military characteristics and deployments (e.g., number and duration of deployment[s]) for Post-9/11 conflicts.                                                                                                                                                |
| VHA inpatient, outpatient and pharmacy data                                               | Longitudinal information on VHA care including purchased care                                                                                                                                                                                                                         |
| Vital Signs                                                                               | Longitudinal DoD and VHA information on height, weight, alcohol screening, pain etc.                                                                                                                                                                                                  |
| Cost data                                                                                 | Longitudinal information on DoD and VHA cost of care                                                                                                                                                                                                                                  |
| Pulmonary Function Tests                                                                  | VA and DoD results of pulmonary function tests                                                                                                                                                                                                                                        |
| Radiology Results                                                                         | Radiology results for Neuroimaging will be examined for abnormal/normal results and specific abnormalities identified (DoD and VA data)                                                                                                                                               |
| VA Comprehensive TBI Evaluation                                                           | Data compiled from the comprehensive TBI evaluation from Post-9/11 Vs who are enrolled in VA healthcare. Data include self-reported TBI/blast exposures, and are incorporated into the allsources TBI severity algorithm; Neurobehavioral Symptom Inventory scores are also included  |
| Prosthetics                                                                               | Specific prosthetics used by Veterans                                                                                                                                                                                                                                                 |
| Behavioral Health Measures                                                                | Longitudinal behavioral health information in VHA (DoD acquisition in progress)                                                                                                                                                                                                       |
| Text Notes                                                                                | VHA texts notes available for natural language processing to identify blast exposure (possibly subconcussive events), cognitive decline/memory issues, problems with activities of daily living/instrumental activities of daily living, social support, psychosocial stressors, etc. |
| COVID-19 Shared Data                                                                      | Data from the COVID-19 repository identifying those who were tested, tested positive, and received inpatient/outpatient care for COVID-19 paid by VA                                                                                                                                  |
| VA Vital Status files                                                                     | The Vital Status files include date of birth and date of death acquired from the VA, DoD and Social Security sources                                                                                                                                                                  |
| Other VHA Screening                                                                       | Screening including but not limited to homelessness and military sexual trauma in health factors data                                                                                                                                                                                 |
| Veterans Benefits Administration Data                                                     | VETSNET provides information on specific service-connected disabilities and benefits received                                                                                                                                                                                         |
| Joint Department of Defense (DoD) and Veterans Affairs (VA) Suicide Data Repository (SDR) | Derived from the National Death Index plus data to identify death from accidents, self-harm, violence, and disease related conditions                                                                                                                                                 |

2) **Longitudinal Data for Gulf War Era Veterans developed within Healthcare Utilization Patterns and Associated Costs for Gulf War I Era Veterans ([hereafter Gulf War study) 1I01 HX001682)**

**Table 2: Data sources for Gulf War era Veteran Cohort.**

| <b>Data Source</b>                                                                        | <b>Purpose</b>                                                                                                                         |
|-------------------------------------------------------------------------------------------|----------------------------------------------------------------------------------------------------------------------------------------|
| VA DoD Identity Repository (VADIR)                                                        | Provides information on military characteristics and deployments (e.g., number and duration of deployment[s]) for Post-9/11 conflicts. |
| VHA inpatient, outpatient, and pharmacy data                                              | Longitudinal information on VHA care including purchased care                                                                          |
| Vital Signs                                                                               | Longitudinal VHA information on height, weight, alcohol screening, pain etc.                                                           |
| Cost data                                                                                 | Longitudinal information on VHA cost of care                                                                                           |
| Pulmonary Function Tests                                                                  | VA results of pulmonary function tests                                                                                                 |
| Radiology Results                                                                         | Radiology results for Neuroimaging will be examined for abnormal/normal results and specific abnormalities identified (VA data)        |
| VA Vital Status files                                                                     | The Vital Status files include date of birth and date of death acquired from the VA, DoD and Social Security sources.                  |
| Other VHA Screening                                                                       | Screening including but not limited to homelessness and military sexual trauma in health factors data.                                 |
| Veterans Benefits Administration Data                                                     | VETSNET provides information on specific service-connected disabilities and benefits received.                                         |
| Joint Department of Defense (DoD) and Veterans Affairs (VA) Suicide Data Repository (SDR) | Derived from the National Death Index plus data to identify death from accidents, self-harm, violence, and disease related conditions. |

Additional data sources identified in **Section A above** can be added as needed.

3) **Geriatric Data including Geriatric Extended Care Data Analysis Center (GECDAC) derived variables developed within the Elizabeth Dole Center of Excellence for Veteran and Caregiver Research (Hereafter Dole COE; I50 HX002767)**

**Table 3: Data sources for Data and Policy Core Cohort**

| <b>Data Source</b>       | <b>Purpose</b>                                                                                                                                                  |
|--------------------------|-----------------------------------------------------------------------------------------------------------------------------------------------------------------|
| GECDAC Core Files        | Characterizes patient GEC service utilization as well as patient diagnoses during the fiscal year.                                                              |
| VA Rx Outpatient         | Includes dispensing information on adult incontinence related products.                                                                                         |
| VA Vital Status Mini     | The Vital Status files include date of birth and date of death acquired from the VA, DoD and Social Security sources.                                           |
| Medicare files via VIREC | Included files with service utilization relevant to long-term institutionalization: skilled and non-skilled home care, skilled nursing facilities, and hospice. |

4) **Outpatient and Inpatient Behavioral Health Care in VA and VA-Purchased Community Care (SDR 18-318; MPI: Rosen, Vanneman, Wagner)**

**Table 4: Data sources for Behavioral Health Care in VA and VA-Purchased Community Care study.**

| <b>Data Source</b>                                 | <b>Purpose</b>                                                                                                                                                                                      |
|----------------------------------------------------|-----------------------------------------------------------------------------------------------------------------------------------------------------------------------------------------------------|
| VA outpatient and inpatient behavioral health data | Longitudinal information on VA behavioral health care including purchased care. These data contain procedure information (CPT and HCPCs) as well as Veteran-level and county-level characteristics. |
